# Supplementary material
Source: ML conference proceedings conference paper supplement (https://proceedings.mlr.press/v48/arpita16.html)
Supplement: Supplementary file 1 [file arpita16-supp.pdf]

# Appendices

## A1 Supplementary Material

### A1.1. Supplementary Proofs

**Lemma 1.** *If assumption 1 is true, and encoding activation function  $s_e(\cdot)$  has first derivative in  $[0, 1]$ , then  $\partial \mathcal{J}_{AE} / \partial b_{e_j} \in [-2\sigma_r \sqrt{n} \|\mathbf{W}_j\|, 2\sigma_r \sqrt{n} \|\mathbf{W}_j\|]$ .*

*Proof.* For squared loss function  $\mathcal{J}_{AE}$ ,

$$\frac{\partial \mathcal{J}_{AE}}{\partial b_{e_j}} = 2\mathbb{E}_{\mathbf{x}} \left[ \frac{\partial s_e(a_j)}{\partial a_j} (\mathbf{x} - \mathbf{W}^T s_e(\mathbf{W}\mathbf{x} + \mathbf{b}_e))^T \mathbf{W}_j \right] = 2\mathbb{E}_{\mathbf{x}} \left[ \frac{\partial s_e(a_j)}{\partial a_j} \mathbf{r}_{\mathbf{x}}^T \mathbf{W}_j \right] \quad (15)$$

where  $a_j = \mathbf{W}_j^T \mathbf{x} + b_j$ . Since  $\frac{\partial s_e(a_j)}{\partial a_j} \in [0, 1]$ ,

$$\mathbb{E}_{\mathbf{x}} \left[ \frac{\partial s_e(a_j)}{\partial a_j} \mathbf{r}_{\mathbf{x}}^T \mathbf{W}_j \right] \leq \mathbb{E}_{\mathbf{x}} \left[ \frac{\partial s_e(a_j)}{\partial a_j} \|\mathbf{r}_{\mathbf{x}}\| \|\mathbf{W}_j\| \right] \leq \|\mathbf{W}_j\| \cdot \mathbb{E}_{\mathbf{x}} [\|\mathbf{r}_{\mathbf{x}}\|] \quad (16)$$

Let  $\mathbf{r}_{\mathbf{x}}$  denote any one of the elements of  $\mathbf{r}_{\mathbf{x}}$ . Since each element of  $\mathbf{r}_{\mathbf{x}}$  is *i.i.d.* from assumption 1 and  $\mathbf{r}_{\mathbf{x}} \in \mathbb{R}^n$ , using Jensen's inequality,  $\mathbb{E}_{\mathbf{x}} [\|\mathbf{r}_{\mathbf{x}}\|_2] \leq \sqrt{n \mathbb{E}_{\mathbf{x}}[\mathbf{r}_{\mathbf{x}}^2]} = \sqrt{n} \sigma_r$ . Thus,

$$\mathbb{E}_{\mathbf{x}} \left[ \frac{\partial s_e(a_j)}{\partial a_j} \mathbf{r}_{\mathbf{x}}^T \mathbf{W}_j \right] \leq \sqrt{n} \sigma_r \|\mathbf{W}_j\| \quad (17)$$

which leads to  $\frac{\partial \mathcal{J}_{AE}}{\partial b_{e_j}} \leq 2\sigma_r \sqrt{n} \|\mathbf{W}_j\|$ . We can similarly prove in the other direction get the desired bound.  $\square$

**Theorem 1.** *Let  $\{\mathbf{W}^t \in \mathbb{R}^{m \times n}, \mathbf{b}_e^t \in \mathbb{R}^m\}$  be the parameters of a regularized auto-encoder ( $\lambda > 0$ )*

$$\mathcal{J}_{RAE} = \mathcal{J}_{AE} + \lambda \mathcal{R}(\mathbf{W}, \mathbf{b}_e) \quad (18)$$

*at training iteration  $t$  with regularization term  $\mathcal{R}(\mathbf{W}, \mathbf{b}_e)$ , activation function  $s_e(\cdot)$  and define pre-activation  $a_j^t = \mathbf{W}_j^t \mathbf{x} + b_{e_j}^t$  (thus  $h_j^t = s_e(a_j^t)$ ). **If**  $\lambda \frac{\partial \mathcal{R}}{\partial b_{e_j}} > 2\sigma_r \sqrt{n} \|\mathbf{W}_j\|$ , where  $j \in \{1, 2, \dots, m\}$ , **then** updating  $\{\mathbf{W}^t, \mathbf{b}_e^t\}$  along the negative gradient of  $\mathcal{J}_{RAE}$ , results in  $\mathbb{E}_{\mathbf{x}}[a_j^{t+1}] < \mathbb{E}_{\mathbf{x}}[a_j^t]$  **and**  $\text{Var}[a_j^{t+1}] = \|\mathbf{W}_j^{t+1}\|^2$  **for all**  $t \geq 0$ .*

*Proof.* At iteration  $t + 1$ ,

$$a_j^{t+1} = a_j^t - \eta \frac{\partial \mathcal{J}_{RAE}}{\partial \mathbf{W}_j} \mathbf{x} - \eta \frac{\partial \mathcal{J}_{RAE}}{\partial b_{e_j}} \quad (19)$$

for any step size  $\eta$ . Expanding  $\mathcal{J}_{RAE}$ , we get,

$$a_j^{t+1} = a_j^t - \eta \frac{\partial \mathcal{J}_{AE}}{\partial \mathbf{W}_j} \mathbf{x} - \eta \frac{\partial \mathcal{J}_{AE}}{\partial b_{e_j}} - \eta \lambda \frac{\partial \mathcal{R}}{\partial \mathbf{W}_j} \mathbf{x} - \eta \lambda \frac{\partial \mathcal{R}}{\partial b_{e_j}} \quad (20)$$

Thus taking expectation over  $\mathbf{x}$  on both sides we get,

$$\mathbb{E}_{\mathbf{x}} [a_j^{t+1}] = \mathbb{E}_{\mathbf{x}} [a_j^t] - \eta \frac{\partial \mathcal{J}_{AE}}{\partial b_{e_j}} - \eta \lambda \frac{\partial \mathcal{R}}{\partial b_{e_j}} \quad (21)$$

Notice the terms containing  $\frac{\partial \mathcal{J}_{AE}}{\partial \mathbf{W}_j}$  and  $\frac{\partial \mathcal{R}}{\partial \mathbf{W}_j}$  in equation 20 disappear because both terms are already a function of expectation over  $\mathbf{x}$  (see various auto-encoder regularizations) when we deal with expected cost function. Thus these terms are linear in  $\mathbf{x}$  and hence taking an expectation results in 0.

From lemma 1,  $\frac{\partial \mathcal{J}_{AE}}{\partial b_{e_j}} \geq -2\epsilon \sqrt{n} \|\mathbf{W}_j\|$ , thus if  $\lambda \frac{\partial \mathcal{R}}{\partial b_{e_j}} > 2\sigma_r \sqrt{n} \|\mathbf{W}_j\|$ , then  $\mathbb{E}_{\mathbf{x}}[a_j^{t+1}] < \mathbb{E}_{\mathbf{x}}[a_j^t]$ .

Finally,  $\text{Var}[a_j^{t+1}] = \mathbb{E}_{\mathbf{x}}[a_j^{t+1} - \mathbb{E}_{\mathbf{x}}[a_j^{t+1}]]^2 = \mathbb{E}_{\mathbf{x}}[\mathbf{W}_j^{t+1} \mathbf{x}]^2 = \|\mathbf{W}_j^{t+1}\|^2$   $\square$

**Corollary 1.** *If  $s_e$  is a non-decreasing activation function with first derivative in  $[0, 1]$  and  $\mathcal{R} = \sum_{j=1}^m f(\mathbb{E}_{\mathbf{x}}[h_j])$  for any monotonically increasing function  $f(\cdot)$ , then  $\exists \lambda > 0$  such that updating  $\{\mathbf{W}^t, \mathbf{b}_e^t\}$  along the negative gradient of  $\mathcal{J}_{RAE}$  results in  $\mathbb{E}_{\mathbf{x}}[a_j^{t+1}] \leq \mathbb{E}_{\mathbf{x}}[a_j^t]$  and  $\text{Var}[a_j^{t+1}] = \|\mathbf{W}_j^{t+1}\|^2$  for all  $t \geq 0$ .*

*Proof.* We need one additional argument other than theorem 1.  $\frac{\partial \mathcal{R}}{\partial b_{e_j}} = \frac{\partial f(\mathbb{E}_{\mathbf{x}}[h_j])}{\partial \mathbb{E}_{\mathbf{x}}[h_j]} \mathbb{E}_{\mathbf{x}} \left[ \frac{\partial h_j}{\partial a_j} \right]$ . Since both  $s_e(\cdot)$  and  $f(\cdot)$  are non-decreasing functions,  $\frac{\partial \mathcal{R}}{\partial b_{e_j}} \geq 0$  in all cases.  $\square$

**Corollary 2.** *If  $s_e$  is a non-decreasing convex activation function with first derivative in  $[0, 1]$  and  $\mathcal{R} = \mathbb{E}_{\mathbf{x}} \left[ \sum_{j=1}^m \left( \left( \frac{\partial h_j}{\partial a_j} \right)^q \|\mathbf{W}_j^t\|_2^p \right) \right]$ ,  $q \in \mathbb{N}$ ,  $p \in \mathbb{W}$ , then  $\exists \lambda > 0$  such that updating  $\{\mathbf{W}^t, \mathbf{b}_e^t\}$  along the negative gradient of  $\mathcal{J}_{RAE}$ , results in  $\mathbb{E}_{\mathbf{x}}[a_j^{t+1}] \leq \mathbb{E}_{\mathbf{x}}[a_j^t]$  and  $\text{Var}[a_j^{t+1}] = \|\mathbf{W}_j^{t+1}\|^2$  for all  $t \geq 0$ .*

*Proof.* We need one additional argument other than theorem 1.  $\frac{\partial \mathcal{R}}{\partial b_{e_j}} = \mathbb{E}_{\mathbf{x}} \left[ q \left( \frac{\partial h_j}{\partial a_j} \right)^{q-1} \frac{\partial^2 h_j}{\partial a_j^2} \frac{\partial a_j}{\partial b_{e_j}} \|\mathbf{W}_j^t\|_2^p \right]$ . Since  $s_e(\cdot)$  is a non-decreasing convex function, both  $\frac{\partial^2 s_e(a_j)}{\partial a_j^2} \geq 0$  and  $\frac{\partial s_e(a_j)}{\partial a_j} \geq 0 \forall a_j \in \mathbb{R}$ . Finally,  $\frac{\partial a_j}{\partial b_{e_j}} = 1$  by definition. Thus  $\frac{\partial \mathcal{R}}{\partial b_{e_j}} \geq 0$  in all cases.  $\square$

**Theorem 2.** *Let  $p_j^t$  denote a lower bound of  $\Pr(h_j^t \leq \delta_{\min})$  at iteration  $t$  and  $s_e(\cdot)$  be a non-decreasing function with first derivative in  $[0, 1]$ . If  $\|\mathbf{W}_j^t\|_2$  is upper bounded independent of  $\lambda$  then  $\exists S \subseteq \mathbb{R}^+$  and  $\exists T_{\min}, T_{\max} \in \mathbb{N}$  such that  $p_j^{t+1} \geq p_j^t \forall \lambda \in S, T_{\min} \leq t \leq T_{\max}$ .*

*Proof.* From theorem 1,  $\mathbb{E}[a_j^{t+1}] < \mathbb{E}[a_j^t] \forall t \geq 0$ . Define  $a_{\min}$  such that  $\delta_{\min} = \max_{a_{\min}} s_e(a_{\min})$ . Thus  $\exists T_{\min} \in \mathbb{N}$ , such that  $\forall t \geq T_{\min}, \mathbb{E}[a_j^t] < a_{\min}$ . Then in the case of non-decreasing activation functions, using Chebyshev's bound,

$$\begin{aligned} \Pr(h_j^t \leq \delta_{\min}) &= \Pr(a_j^t \leq a_{\min}) \geq \Pr(|a_j^t - \mathbb{E}[a_j^t]| \leq a_{\min} - \mathbb{E}[a_j^t]) \\ &\geq 1 - \frac{\text{Var}[a_j^t]}{(a_{\min} - \mathbb{E}[a_j^t])^2} \end{aligned} \quad (22)$$

Thus  $p_j^t := 1 - \frac{\text{Var}[a_j^t]}{(a_{\min} - \mathbb{E}[a_j^t])^2}$  lower bounds  $\Pr(h_j^t \leq \delta_{\min}) \forall t \geq T_{\min}$ . Now consider the difference

$$D(t) := \frac{\text{Var}[a_j^{t+1}]}{(a_{\min} - \mathbb{E}[a_j^{t+1}])^2} - \frac{\text{Var}[a_j^t]}{(a_{\min} - \mathbb{E}[a_j^t])^2} \quad (23)$$

and recall that

$$\mathbb{E}_{\mathbf{x}} [a_j^{t+1}] = \mathbb{E}_{\mathbf{x}} [a_j^t] - \eta \frac{\partial \mathcal{J}_{AE}}{\partial b_{e_j}} - \eta \lambda \frac{\partial \mathcal{R}}{\partial b_{e_j}} \quad (24)$$

where both the step size  $\eta$  and  $\frac{\partial \mathcal{R}}{\partial b_{e_j}}$  are positive and  $\partial \mathcal{J}_{AE} / \partial b_{e_j} \in [-2\sigma_r \sqrt{n} \|\mathbf{W}_j\|, 2\sigma_r \sqrt{n} \|\mathbf{W}_j\|]$ . Thus, since  $\text{Var}[a_j] = \|\mathbf{W}_j^t\|^2$ , we can always choose a fixed  $S \subseteq \mathbb{R}^+$  such that  $D(t) \leq 0 \forall \lambda \in S$  and  $T_{\min} \leq t \leq T_{\max}$ .  $\square$

**Theorem 3.** *Let  $\{\mathbf{W}, \mathbf{b}_e\}$  represent the parameters of a DAE with squared loss, linear decoding, and i.i.d. Gaussian corruption with zero mean and  $\sigma^2$  variance, at any point of training over data sampled from distribution  $\mathcal{D}$ . Let  $a_j := \mathbf{W}_j \mathbf{x} + b_{e_j}$  so that  $h_j = s_e(a_j)$  corresponding to sample  $\mathbf{x} \sim \mathcal{D}$ . Then,*

$$\begin{aligned} \mathcal{J}_{DAE} &= \mathcal{J}_{AE} + \sigma^2 \mathbb{E}_{\mathbf{x}} \left[ \sum_{j=1}^m \left( \left( \frac{\partial h_j}{\partial a_j} \right)^2 \|\mathbf{W}_j\|_2^4 \right) + \sum_{\substack{j,k=1 \\ j \neq k}}^m \left( \frac{\partial h_j}{\partial a_j} \frac{\partial h_k}{\partial a_k} (\mathbf{W}_j^T \mathbf{W}_k)^2 \right) \right. \\ &\quad \left. + \sum_{i=1}^n \left( (\mathbf{b}_d + \mathbf{W}^T \mathbf{h} - \mathbf{x})^T \mathbf{W}^T \left( \frac{\partial^2 \mathbf{h}}{\partial \mathbf{a}^2} \odot \mathbf{W}^i \odot \mathbf{W}^i \right) \right) \right] + o(\sigma^2) \end{aligned} \quad (25)$$

where  $\frac{\partial^2 \mathbf{h}}{\partial \mathbf{a}^2} \in \mathbb{R}^m$  is the element-wise  $2^{nd}$  derivative of  $\mathbf{h}$  w.r.t.  $\mathbf{a}$  and  $\odot$  is element-wise product.

*Proof.* Using  $2^{nd}$  order Taylor's expansion of the loss function, we get

$$\ell(\mathbf{x}, f_d(f_e(\tilde{\mathbf{x}}))) = \ell(\mathbf{x}, f_d(f_e(\mu_{\mathbf{x}}))) + (\tilde{\mathbf{x}} - \mu_{\mathbf{x}})^T \nabla_{\tilde{\mathbf{x}}} \ell + \frac{1}{2} (\tilde{\mathbf{x}} - \mu_{\mathbf{x}})^T \nabla_{\tilde{\mathbf{x}}}^2 \ell (\tilde{\mathbf{x}} - \mu_{\mathbf{x}}) + o(\sigma^2) \quad (26)$$

where  $\mu_{\mathbf{x}} = \mathbf{x}$ . since we assume zero mean Gaussian noise. Thus taking the expectation of this approximation over noise yields

$$\mathbb{E}[\ell(\mathbf{x}, f_d(f_e(\tilde{\mathbf{x}})))] = \mathbb{E}[\ell(\mathbf{x}, f_d(f_e(\mu_{\mathbf{x}})))] + \frac{1}{2} \text{tr}(\Sigma_{\mathbf{x}} \nabla_{\tilde{\mathbf{x}}}^2 \ell) + o(\sigma^2) \quad (27)$$

where  $\Sigma_{\mathbf{x}} := \mathbb{E}[(\tilde{\mathbf{x}} - \mu_{\mathbf{x}})(\tilde{\mathbf{x}} - \mu_{\mathbf{x}})^T]$ . Since the corruption is *i.i.d.*, assume the covariance  $\Sigma_{\mathbf{x}} = \sigma^2 \mathbf{I}$ , where  $\mathbf{I}$  is the identity matrix.

Taking expectation over  $\mathbf{x}$ , we can rewrite equation (27) as

$$\mathcal{J}_{DAE} = \mathcal{J}_{AE} + \mathbb{E}_{\mathbf{x}} \left[ \frac{1}{2} \sigma^2 \sum_{i=1}^n \frac{\partial^2 \ell}{\partial \tilde{x}_i^2} \right] + o(\sigma^2) \quad (28)$$

Expanding the second order term in the above equation, we get

$$\frac{\partial^2 \ell}{\partial \tilde{x}_i^2} = \frac{\partial \mathbf{h}^T}{\partial \tilde{x}_i} \frac{\partial^2 \ell}{\partial \mathbf{h}^2} \frac{\partial \mathbf{h}}{\partial \tilde{x}_i} + \frac{\partial \ell}{\partial \mathbf{h}} \frac{\partial^2 \mathbf{h}}{\partial \tilde{x}_i^2} \quad (29)$$

For linear decoding and squared loss,

$$\frac{\partial \ell}{\partial \mathbf{h}} \frac{\partial^2 \mathbf{h}}{\partial \tilde{x}_i^2} = \sum_{i=1}^n \left( (\mathbf{b}_d + \mathbf{W}^T \mathbf{h} - \mathbf{x})^T \mathbf{W}^T \left( \frac{\partial^2 \mathbf{h}}{\partial \mathbf{a}^2} \odot \mathbf{W}^i \odot \mathbf{W}^i \right) \right) \quad (30)$$

where  $\frac{\partial^2 \mathbf{h}}{\partial \mathbf{a}^2} \in \mathbb{R}^m$  is the element-wise  $2^{nd}$  derivative of  $\mathbf{h}$  w.r.t.  $\mathbf{a}$ ,  $\odot$  represents element-wise product and  $\mathbf{W}^i$  denotes the  $i^{th}$  column of  $\mathbf{W}$ . Let vector  $\mathbf{d}_h \in \mathbb{R}^m$  be defined such that  $d_{h_j} = \frac{\partial h_j}{\partial a_j} \forall j \in \{1, 2, \dots, m\}$ . Then,

$$\sum_{i=1}^n \frac{\partial \mathbf{h}^T}{\partial \tilde{x}_i} \frac{\partial^2 \ell}{\partial \mathbf{h}^2} \frac{\partial \mathbf{h}}{\partial \tilde{x}_i} = 2 \sum_{j=1}^n \sum_{k=1}^n ((\mathbf{d}_h \odot (\mathbf{W}^j)^T (\mathbf{W}^k))^2) \quad (31)$$

where  $(\mathbf{W}^j)^T$  represents the  $j^{th}$  column of  $\mathbf{W}$  and  $\odot$  denotes element-wise product. Let  $\mathbf{D}_h = \text{diag}(\mathbf{d}_h)$ . Then,

$$\sum_{j=1}^n \sum_{k=1}^n ((\mathbf{d}_h \odot (\mathbf{W}^j)^T (\mathbf{W}^k))^2) = \|(\mathbf{D}_h \mathbf{W})^T \mathbf{W}\|_F^2 \quad (32)$$

Finally, using the cyclic property of trace operator, we get,  $\|(\mathbf{D}_h \mathbf{W})^T \mathbf{W}\|_F^2 = \text{tr}(\mathbf{W}^T \mathbf{D}_h \mathbf{W} \mathbf{W}^T \mathbf{D}_h \mathbf{W}) = \text{tr}(\mathbf{D}_h \mathbf{W} \mathbf{W}^T \mathbf{D}_h \mathbf{W} \mathbf{W}^T)$ . Thus DAE objective becomes,

$$\mathcal{J}_{DAE} = \mathcal{J}_{AE} + \sigma^2 \mathbb{E}_{\mathbf{x}} \left[ \text{tr}(\mathbf{D}_h \mathbf{W} \mathbf{W}^T \mathbf{D}_h \mathbf{W} \mathbf{W}^T) + \sum_{i=1}^n \left( (\mathbf{b}_d + \mathbf{W}^T \mathbf{h} - \mathbf{x})^T \mathbf{W}^T \left( \frac{\partial^2 \mathbf{h}}{\partial \mathbf{a}^2} \odot \mathbf{W}^i \odot \mathbf{W}^i \right) \right) \right] + o(\sigma^2) \quad (33)$$

Upon expansion of the second term above, we get the final form. □

**Remark 3.** Let  $\{\mathbf{W} \in \mathbb{R}^{m \times n}, \mathbf{b}_e \in \mathbb{R}^m\}$  represent the parameters of a Marginalized De-noising Auto-Encoder (mDAE) with  $s_e(\cdot)$  activation function, linear decoding, squared loss and  $\sigma_{\mathbf{x}_i}^2 = \lambda \forall i \in \{1, \dots, n\}$ , at any point of training over data sampled from some distribution  $\mathcal{D}$ . Let  $a_j := \mathbf{W}_j \mathbf{x} + b_{e_j}$  so that  $h_j = s_e(a_j)$  corresponding to sample  $\mathbf{x} \sim \mathcal{D}$ . Then,

$$\mathcal{J}_{mDAE} = \mathcal{J}_{AE} + \lambda \mathbb{E}_{\mathbf{x}} \left[ \sum_{j=1}^m \left( \left( \frac{\partial h_j}{\partial a_j} \right)^2 \|\mathbf{W}_j\|_2^4 \right) \right] \quad (34)$$

*Proof.* For linear decoding and squared loss,  $\frac{\partial^2 \ell}{\partial h_j^2} = 2\|\mathbf{W}_j\|_2^2$  and  $\frac{\partial h_j}{\partial \mathbf{x}_i} = \frac{\partial h_j}{\partial a_j} W_{ji}$ . Thus

$$\begin{aligned} \frac{1}{2} \sum_{i=1}^n \sigma_{\mathbf{x}_i}^2 \sum_{j=1}^m \frac{\partial^2 \ell}{\partial h_j^2} \left( \frac{\partial h_j}{\partial \mathbf{x}_i} \right)^2 &= \sum_{i=1}^n \lambda \sum_{j=1}^m \|\mathbf{W}_j\|_2^2 \left( \frac{\partial h_j}{\partial a_j} W_{ji} \right)^2 \\ &= \lambda \sum_{j=1}^m \|\mathbf{W}_j\|_2^2 \left( \frac{\partial h_j}{\partial a_j} \right)^2 \sum_{i=1}^n W_{ji}^2 = \lambda \sum_{j=1}^m \left( \frac{\partial h_j}{\partial a_j} \right)^2 \|\mathbf{W}_j\|_2^4 \end{aligned} \quad (35)$$

□
